# Supplementary material for: Fused triphenylamine moiety based fluorescence emitters for deep blue OLEDs with high luminance and low turn-on voltages
Source: Royal Society of Chemistry journal article supplement (doi:10.1039/d1ma01044a), 2021-12-23
Supplement: d1ma01044a1.pdf [file d1ma01044a1.pdf]

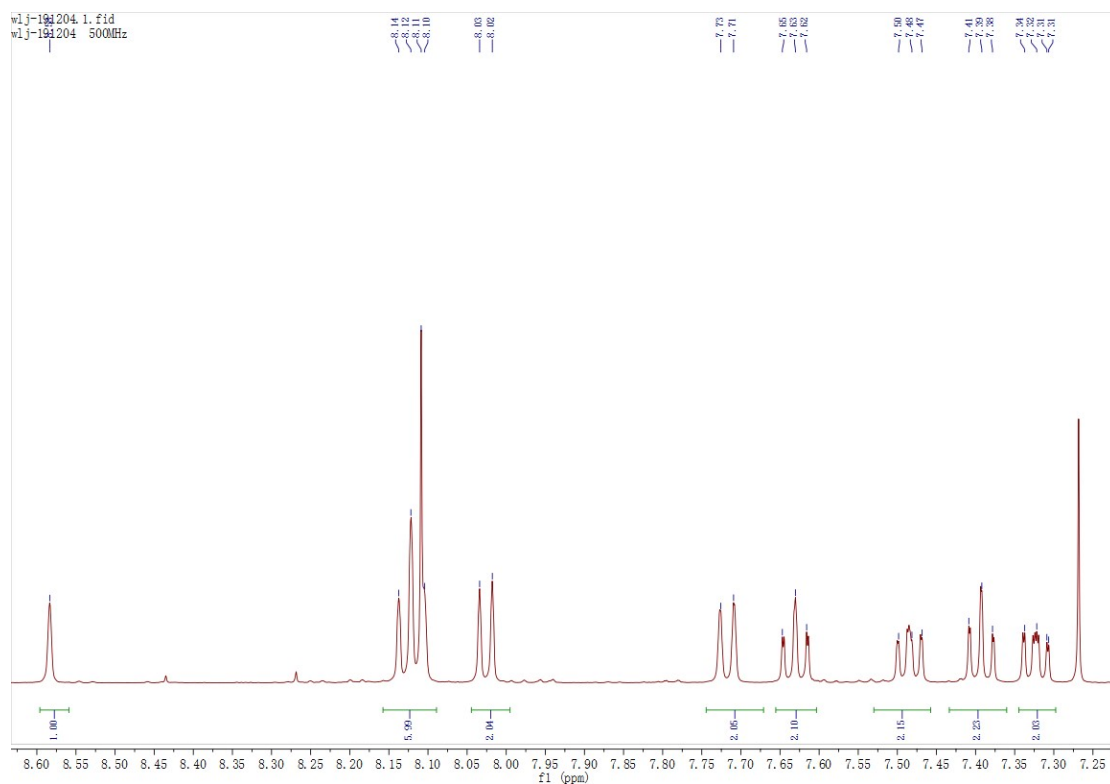

Figure S4.  $^1\text{H-NMR}$  spectra of FTPA-An (4).

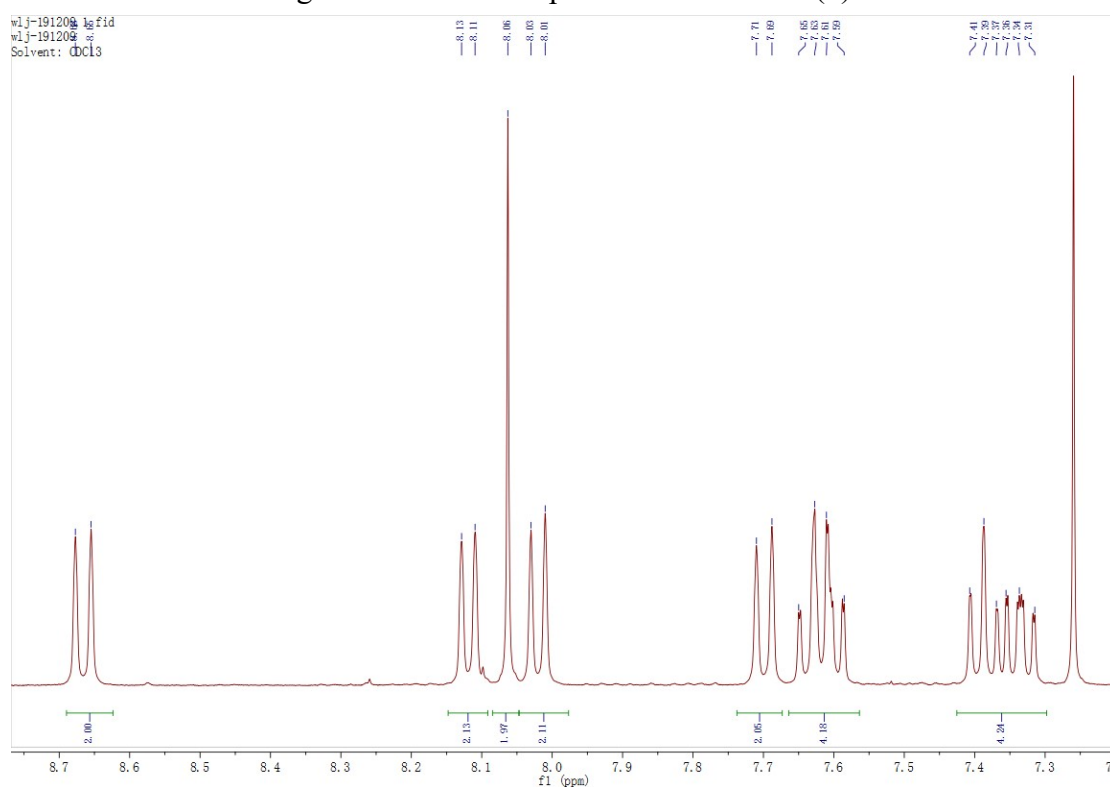

Figure S5.  $^1\text{H-NMR}$  spectra of FTPA-An-Br (5).



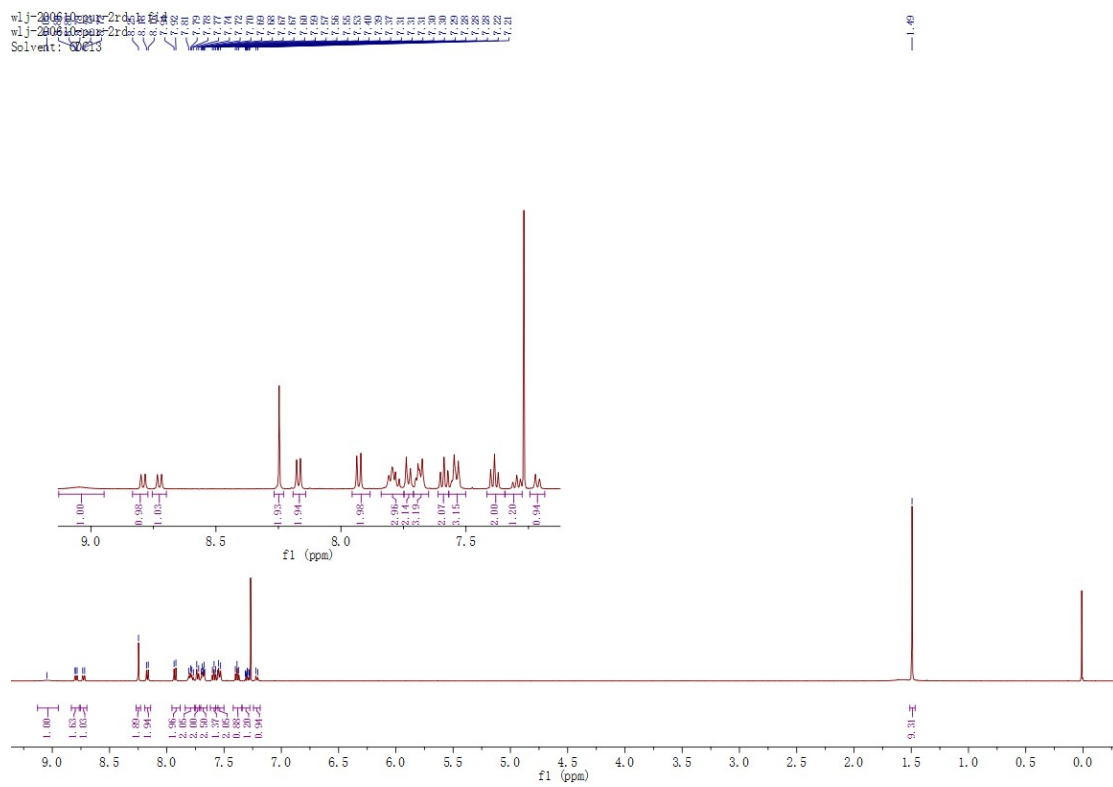

Figure S8. <sup>1</sup>H-NMR spectra of PI-FTP.

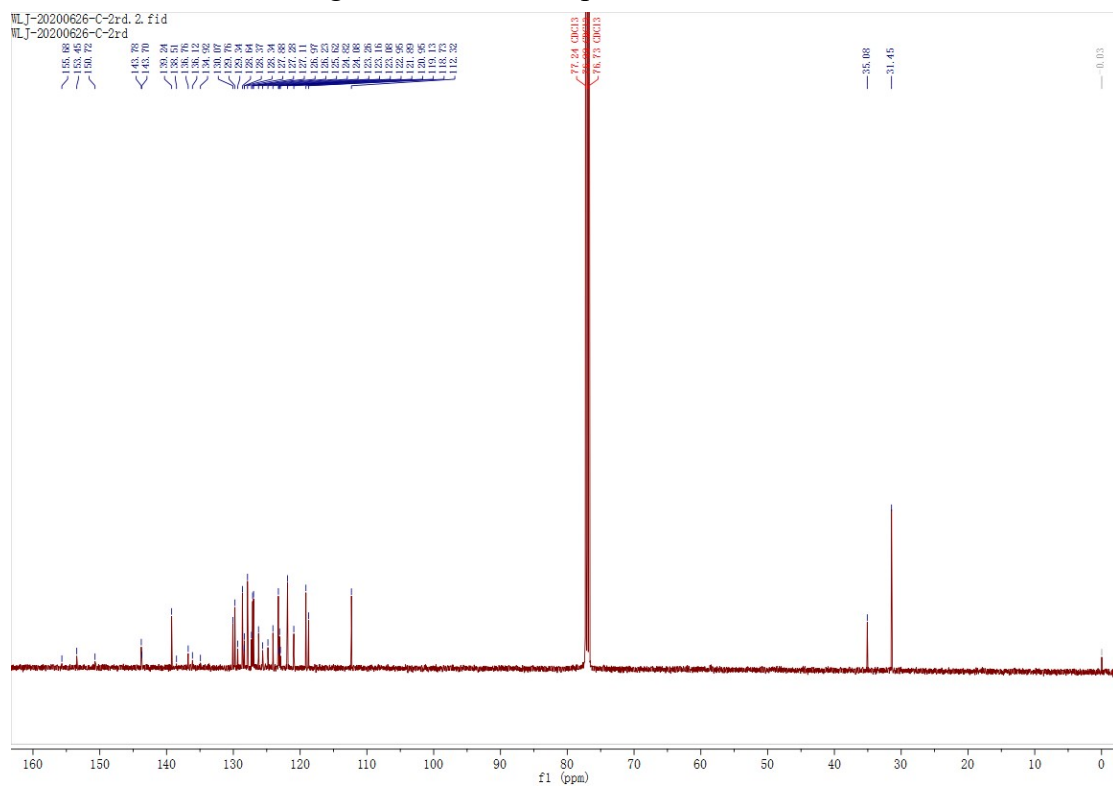

Figure S9. <sup>13</sup>C-NMR spectra of PI-FTP.

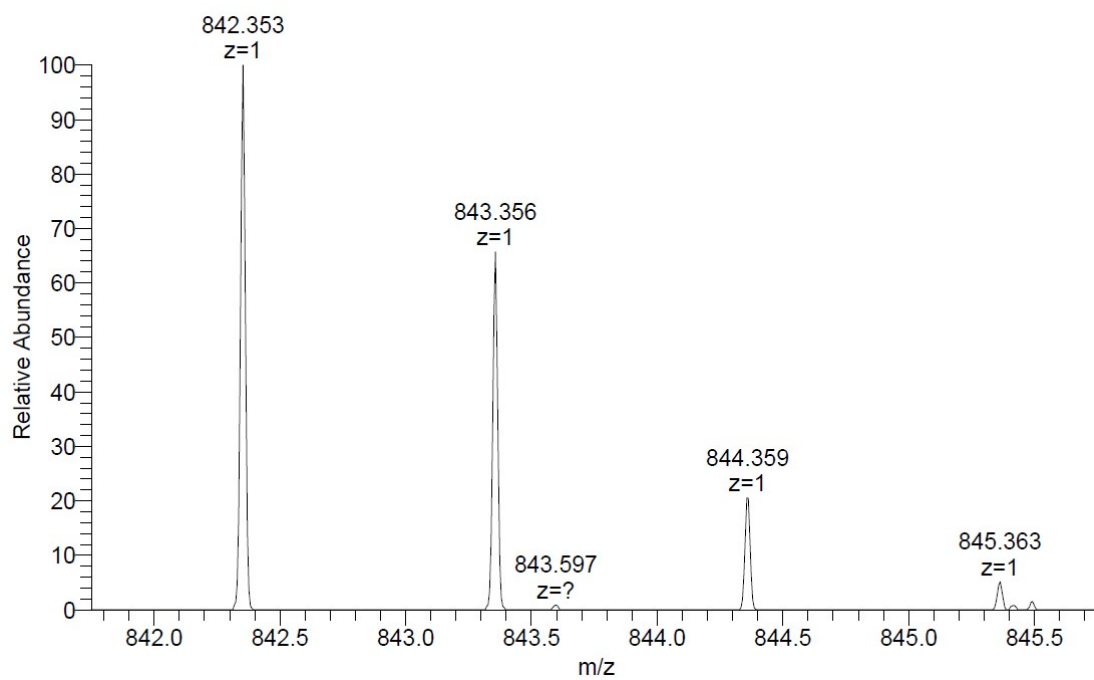

Figure S10. HRMS of PIAN-FTPA.

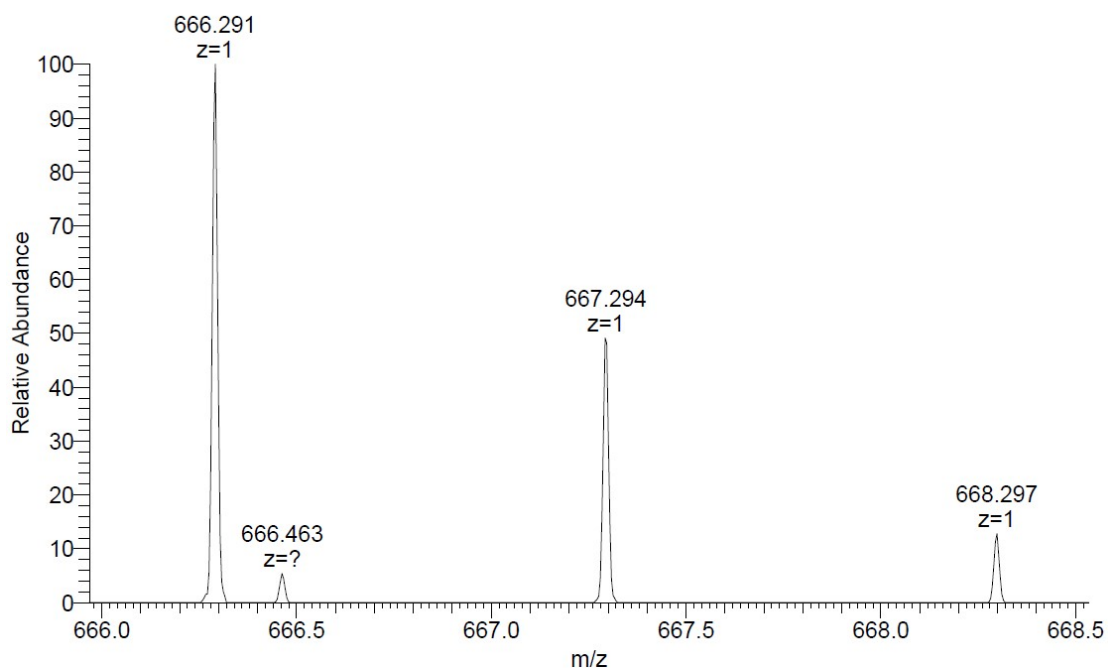

Figure S11. HRMS of PI-FTPA.

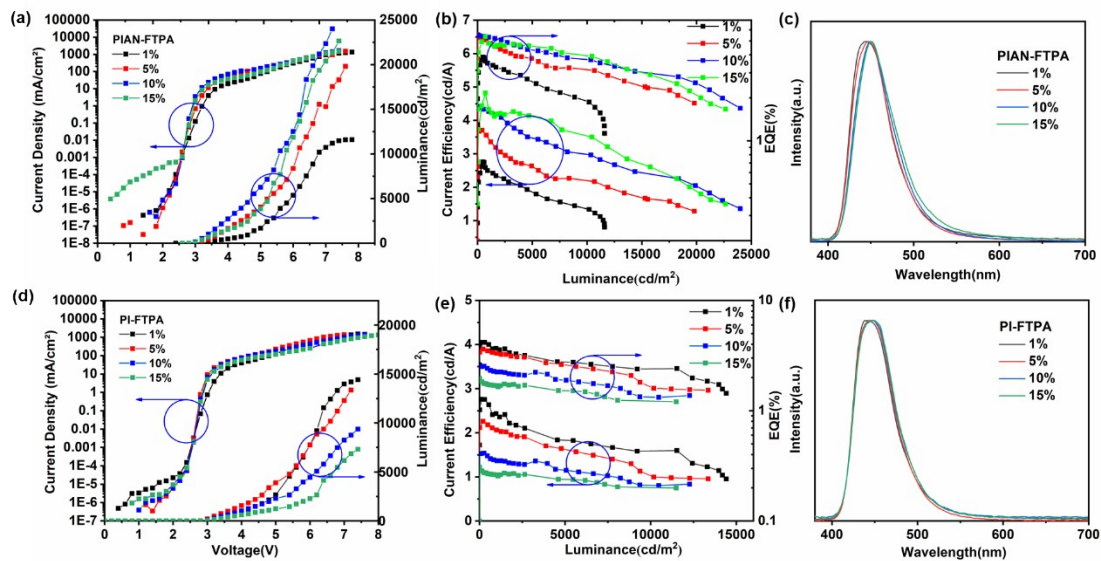

Figure S12. Electroluminescence characteristics of OLEDs based on PIAN-FTPA and PI-FTPA.  $J$ - $V$ - $L$  characteristics of PIAN-FTPA devices (a) and PI-FTPA devices (d); EQE and CE vs luminance characteristics of PIAN-FTPA devices (b) and PI-FTPA devices (e); EL spectra at 4V of PIAN-FTPA (c) and PI-FTPA (f);

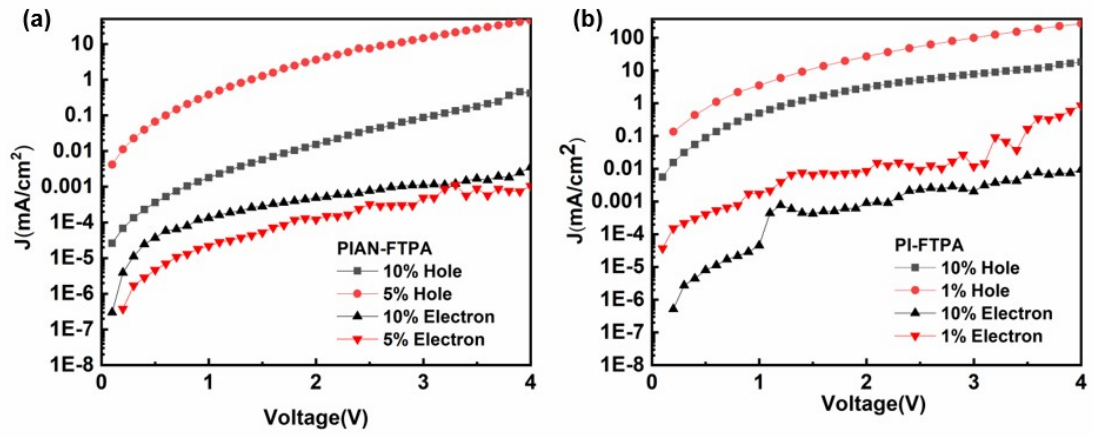

Figure S13. The carrier mobility of EML layer of PIAN-FTPA (a) and PI-FTPA (b).



Table S1 the performance of some reported blue OLEDs

| Material     | Turn-on voltage(V) | EQE(%) | $L_{\max}$ (cd/m <sup>2</sup> ) | CIE       | Ref.      |
|--------------|--------------------|--------|---------------------------------|-----------|-----------|
| PIAN-FTPA    | 2.8                | 5.74   | 24000                           | 0.15,0.09 | This work |
| PI-FTPA      | 2.8                | 4.17   | 14420                           | 0.14,0.07 | This work |
| BD3          | 3.7                | 12     | 4778                            | 0.15,0.06 | 1         |
| CN-SBAF      | 2.7                | 12.6   | ~6000                           | 0.15,0.10 | 2         |
| PPI-PPIPCz   | 3.2                | 8.1    | 13950                           | 0.15,0.08 | 3         |
| NAXPT        | 2.8                | 6.6    | ~4000                           | 0.15,0.07 | 4         |
| PyINA        | 3.4                | 5.05   | 13600                           | 0.16,0.06 | 5         |
| CBPMCn       | 3.4                | 4.71   | 10800                           | 0.15,0.08 | 6         |
| BBPA         | 3.6                | 10.27  | ~4000                           | 0.15,0.05 | 7         |
| DTXSAF       | 4.1                | 7.7    | ~1000                           | 0.15,0.08 | 8         |
| PPi-Mid      | 3.15               | 6.01   | 14350                           | 0.15,0.08 | 9         |
| $\nu$ -DABNA | 3.4                | 34.4   |                                 | 0.12,0.11 | 10        |
| DPy-PPI      | 3.2                | 4.24   | ~4000                           | 0.14,0.06 | 11        |
| pTAHPI       | 2.8                | 8.13   | 18100                           | 0.15,0.23 | 12        |
| PBI-PPI-TPA  | 2.8                | 6.88   | 10612                           | 0.15,0.09 | 13        |

1. J.-Y. Hu, Y.-J. Pu, F. Satoh, S. Kawata, H. Katagiri, H. Sasabe and J. Kido, *Adv. Funct. Mater.*, 2014, **24**, 2064-2071.
2. S. J. Cha, N. S. Han, J. K. Song, S.-R. Park, Y. M. Jeon and M. C. Suh, *Dyes Pigm.*, 2015, **120**, 200-207.
3. C. Li, S. Wang, W. Chen, J. Wei, G. Yang, K. Ye, Y. Liu and Y. Wang, *Chem. Commun.*, 2015, **51**, 10632-10635.
4. K.-H. Kim, J. Y. Baek, C. W. Cheon, C.-K. Moon, B. Sim, M. Y. Choi, J.-J. Kim and Y.-H. Kim, *Chem. Commun.*, 2016, **52**, 10956-10959.
5. T. Shan, Y. Liu, X. Tang, Q. Bai, Y. Gao, Z. Gao, J. Li, J. Deng, B. Yang, P. Lu and Y. Ma, *ACS Appl. Mater. Interfaces*, 2016, **8**, 28771-28779.
6. Y. Tan, Z. Zhao, L. Shang, Y. Liu, C. Wei, J. Li, H. Wei, Z. Liu, Z. Bian and C. Huang, *J. Mater. Chem. C*, 2017, **5**, 11901-11909.
7. S. Wang, M. Qiao, Z. Ye, D. Dou, M. Chen, Y. Peng, Y. Shi, X. Yang, L. Cui, J. Li, C. Li, B. Wei and W. Y. Wong, *iScience*, 2018, **9**, 532-541.
8. S.-J. Woo, Y. Kim, M.-J. Kim, J. Y. Baek, S.-K. Kwon, Y.-H. Kim and J.-J. Kim, *Chem. Mater.*, 2018, **30**, 857-863.
9. J. Zhao, B. Liu, Z. Wang, Q. Tong, X. Du, C. Zheng, H. Lin, S. Tao and X. Zhang, *ACS Appl. Mater. Interfaces*, 2018, **10**, 9629-9637.
10. Y. Kondo, K. Yoshiura, S. Kitera, H. Nishi, S. Oda, H. Gotoh, Y. Sasada, M. Yanai and T. Hatakeyama, *Nat. Photon.*, 2019, **13**, 678-682.
11. G.-X. Yang, Y. Chen, J.-J. Zhu, J.-Y. Song, S.-S. Tang, D. Ma and Q.-X. Tong, *Dyes Pigm.*, 2021, **187**, 109088.
12. W. Li, P. Chasing, W. Benchaphanthawee, P. Nalaoh, T. Chawanpunyawat, C. Kaiyasuan, N. Kungwan, S. Namuangruk, T. Sudyoasuk and V. Promarak, *J. Mater. Chem. C*, 2021, **9**, 497-507.
13. J.-J. Zhu, Y. Chen, Y.-H. Xiao, X. Lian, G.-X. Yang, S.-S. Tang, D. Ma, Y. Wang and Q.-X. Tong, *J. Mater. Chem. C*, 2020, **8**, 2975-2984.
